# Supplementary material for: Thought-Controlled Nanoscale Robots in a Living Host
Source: PubMed Central journal article supplement (PMC4985062; doi:10.1371/journal.pone.0161227), 2016-08-15
Supplement: pone.0161227.s001.pdf [file pone.0161227.s001.pdf]

# S1 note: Algorithm Design

The SVM-LDA Algorithm for Cognitive Classification (SLACC) is a supervised learning algorithm, which receives raw data from EEG readings as an input, and outputs a classification vector  $C \in \{0,1\}^t$ , where  $t$  is the number of seconds in the tested input,  $c_i = 1$  if the  $i^{th}$  second was classified as "cognitive load", and  $c_i = 0$  if it was classified as "cognitive rest". Furthermore, a "score" can be calculated for a time interval  $I$ , to avoid an irregular classification over large periods of time, denoted  $S_i$ . SLACC is composed of two major segments: (1) a training process that trains the SVM to distinguish "cognitive load" from "cognitive rest"; and (2) a testing process, which classifies unlabeled data according to the SVM model. The algorithm outline is shown as a pipeline in [Fig 1](#), followed by an elaborate description of each segment.

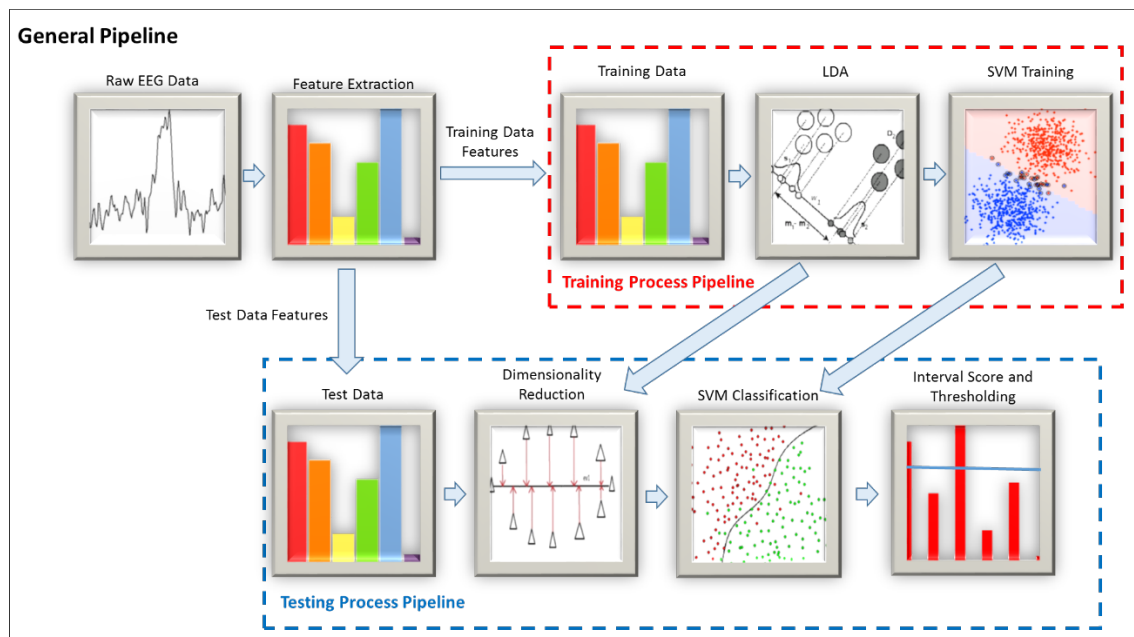

Fig 1: An outline of the SLACC pipeline.

The raw EEG data collected, as described in Section X.Y, is processed into six features for each of the four electrodes. Five features were extracted using the fast Fourier transform (FFT) – theta (4-7Hz), alpha(8-12Hz), low Beta(13-21Hz), high Beta(22-30Hz), and gamma(30-100Hz) – along with the root mean square (RMS). These features are extracted over a 4 second running window, calculated every second (resulting in a 3-second overlap between windows, as illustrated in [Fig 2](#)). The result is a  $24 \times 1024$  matrix of featured data for every running window,

concatenated with all other running windows in chronological order. We denote this  $24 \times 1024t$  matrix  $X$ .

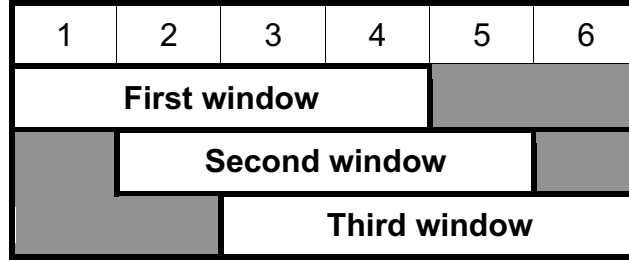

Fig 2: running window illustration

Training stage: Data from  $X$  is allocated for training, denoted  $X_{train}$ , along with a corresponding vector  $y$ , which is a label for each window of the training data (computed manually in accordance with the data collection protocol), i.e., every window of  $X_{train}$  is labeled "1" or "0" in the corresponding element of  $y$ . Dimensionality reduction for  $X_{train}$  from 24 dimensions to 2 dimensions is implemented using LDA. We use two Eigen vectors computed by the LDA, denoted  $v_1, v_2$ . Dimensionality reduction is achieved by projecting  $X_{train}$  on  $v_1, v_2$ . We denote the result  $X_{train}^{(2)}$ . The training data  $X_{train}^{(2)}$  and the labels  $y$  are transferred to the SVM for a training process, which results in a model discriminating "cognitive load" (1) and "cognitive rest" (0).

Testing stage: The test data,  $X_{test}$ , is projected on  $v_1$  and  $v_2$  from the training stage, and the result, denoted  $X_{test}^{(2)}$ , is sent to the trained SVM for classification. The classifier output is a vector  $C$ , which indicates the SVM classification of each second of  $X_{test}^{(2)}$ . In order to avoid erratic classification caused by low precision or high sensitivity, the vector  $C$  can be augmented into time intervals larger than 1 second, denoted  $I_1, I_2, \dots, I_t$ . Once performed, a score  $s(C, I_j)$  can be calculated for each interval, where:  $s(C, I_j) = \frac{\sum_{i \in I_j} (c_i)}{|I_j|}$ , i.e. the sum of all 1's in interval  $I_j$ , divided by its length in seconds. We note that  $s(C, I_j) \in [0, 1]$ , and by assigning a threshold parameter  $h$  we can classify "cognitive load" for an interval  $I_j$  if  $s(C, I_j) \geq h$ , or "cognitive rest" for  $s(C, I_j) < h$ , and circumvent inconsistent 1 second classification.
